# Supplementary material
Source: Research Square preprint supplement (doi:10.21203/rs.3.rs-9481684/v1)
Supplement: Supplementary file 1 [file 0bfe9bb99044fdcc423f8598.docx]

**Supplementary file 1**

# Delphi Study on Collaboration in Hip and Knee Osteoarthritis Care

**Round 1 Survey**

## Introduction

Dear colleague,

Thank you for your willingness to participate in the study on recommendations to improve collaboration around the conservative care of hip and knee osteoarthritis. We are conducting this study because the use of conservative care in patients with hip or knee osteoarthritis is suboptimally implemented. In the literature, professional interaction between healthcare providers in primary and secondary care is cited as an important barrier to optimal use of conservative care.

Below you will find the instructions for the survey. If anything is unclear, please contact the researcher. The contact details are listed below.

**Survey**

In this survey, we are interested in your views on collaboration between the various healthcare providers. Additionally, three vignettes have been added in which you are asked what, in your opinion, constitutes appropriate care. It is enormously helpful if you answer each question as comprehensively as possible. The survey concludes with a few brief questions about yourself.

All answers you provide in the survey are treated anonymously. Completing the survey takes approximately 10 minutes. We would appreciate it if you could complete the survey as soon as possible, in the interest of the study's progress.

**Contact**

If you have questions about the survey, please contact researcher John Reijnen from Sint Maartenskliniek via j.reijnen@maartenskliniek.nl.

**Consent**

If you wish to participate in this study, we ask you to carefully read the following points and then tick the box below:

- I have read the information letter in the email. I have been given the opportunity to ask additional questions and these have been sufficiently answered. I had sufficient time to make my decision.
- I understand that participation is voluntary. I understand that at any time I can decide not to participate or to stop participating. I do not need to give a reason for this.
- I give permission for the collection and use of my data for answering the research question of this study.

*** I wish to participate in this study.**

○ Yes

○ No

## Participant Information

* What is your email address?

*[open field]*

* What is your profession?

☐ General Practitioner (GP)

☐ Physiotherapist

☐ Orthopaedic Surgeon

* What is your age?

*[open field]*

* What is your gender?

○ Male

○ Female

○ Other / Prefer not to say

* How many years have you been working as a healthcare provider in your current role?

*[open field]*

* How many new patients with hip and knee osteoarthritis do you see each month?

*[open field]*

* Where do you work?

○ Solo GP practice

○ Group GP practice

○ Health centre

○ Solo physiotherapy practice

○ Group physiotherapy practice

○ Regional hospital

○ Academic hospital

○ Independent treatment centre (ZKN)

## Collaboration

* Please indicate how you experience collaboration between yourself and other healthcare providers involved in the conservative treatment of hip and knee osteoarthritis.

*[Scale: 0 ——————————————————————————————— 100]*

* In what way can collaboration around the conservative treatment of hip and knee osteoarthritis be improved?

*[open text field]*

* What is needed to realise the improvement you proposed in the previous question?

*[open text field]*

## Clinical Vignettes

In order to gain better insight into the considerations you make, three brief vignettes follow. For each vignette, please indicate what you consider to be appropriate care. By appropriate care we mean the right care, at the right time, by the right healthcare provider, close to home where possible and further away when necessary.

**Vignette 1 – Mr Jansen (65 years old) – GP Context**

Mr Jansen (65 years old) reports that his walking distance is significantly limited by complaints resulting from his hip osteoarthritis. He is an avid walker, used to going on walks of 30 km, but now struggles with 2 km. This has a major impact on his quality of life. Mr Jansen has no or almost no pain at rest, and his sleep is not disturbed. There are no comorbidities. Mr Jansen does regularly use pain relief, and also uses an anti-inflammatory for walking. He asks his GP for a referral to an orthopaedic surgeon.

**What should the GP do in your opinion?**

*[open text field]*

**Vignette 2 – Mrs Pieterse (70 years old) – Physiotherapist Context**

Mrs Pieterse (70 years old) has complaints in both knees, but very much wants to continue babysitting her grandchildren three days a week. This is now becoming more difficult; she can no longer lift the youngest onto the changing table and experiences increasing knee pain throughout a babysitting day. On babysitting days she takes pain relief preventively. She has consulted her physiotherapist, who establishes that her complaints may indeed be consistent with knee osteoarthritis. Mrs Pieterse does not engage in sport, but cycles to her grandchildren on the other side of town and walks 1 to 2 times a day with her Jack Russell terrier. She also has a BMI of 30.7. Mrs Pieterse is unsure what to do.

**What should the physiotherapist do in your opinion?**

*[open text field]*

**Vignette 3 – Mrs Van de Berk (64 years old) – Orthopaedic Surgeon Context**

Mrs Van de Berk (64 years old) plays golf three times a week (18 holes). She also babysits two days a week. She has suffered from lower back pain for several years and, after various treatment trajectories with different physiotherapists for her back complaints, she presents to her GP. Physiotherapy consisted of posture exercises, lifting advice, and manual therapy of the back. A friend has suggested that the problem is not with her back but with her hips. The GP refers her to an orthopaedic surgeon, who confirms via X-ray that there is bilateral hip osteoarthritis with significant joint space narrowing, but almost no degenerative changes in her lumbar spine. Mrs Van de Berk is not overweight and uses paracetamol only occasionally.

**What should the orthopaedic surgeon do in your opinion?**

*[open text field]*

Thank you for participating in Round 1 of this Delphi study. You will shortly receive a summary of the answers given to the questions and vignettes, and you will be invited to answer some new questions.

# Round 2 – Delphi Study on Collaboration in Hip and Knee Osteoarthritis Care

## Introduction

Dear colleague,

Thank you very much for your contribution to Round 1 of the Delphi study on recommendations to improve collaboration around the conservative care of hip and knee osteoarthritis. This survey is part of the 2nd round of the Delphi study.

In this survey you will read back the answers given by yourself and colleague GPs, orthopaedic surgeons, and physiotherapists who participated in Round 1 of this Delphi study. You can compare these answers with your own answers, which you have received in a personal email. In this survey we ask you to rate the answers from Round 1 on a scale of 0 to 10. This is an important step in the Delphi process to work towards consensus on recommendations to overcome barriers to the conservative treatment of hip and knee osteoarthritis. All answers you provide in the survey are treated anonymously.

In the interest of the study's progress, we would very much appreciate it if you could complete the survey within 2 weeks. Completing the survey takes approximately 10 minutes.

**Contact**

If you have questions about the survey, please contact researcher John Reijnen from Sint Maartenskliniek via j.reijnen@maartenskliniek.nl.

* What is your email address?

*[open field]*

## How can collaboration be improved? (Rating 1–10)

In the Round 1 survey you were asked how collaboration around the conservative treatment of hip and knee osteoarthritis can be improved. After analysis, the following categories emerged. Please rate each category with a score between 0 and 10.

| **Recommendation** | **1** | **2** | **3** | **4** | **5** | **6** | **7** | **8** | **9** | **10** |
| --- | --- | --- | --- | --- | --- | --- | --- | --- | --- | --- |
| Improving patient information (consistent information, in line with guidelines, provided by healthcare providers to patients about osteoarthritis, the course of osteoarthritis, and self-management) | ○ | ○ | ○ | ○ | ○ | ○ | ○ | ○ | ○ | ○ |
| Improving communication (agreements on how healthcare providers communicate with each other, through which channels, at which point in time, with what content, and with what goal) | ○ | ○ | ○ | ○ | ○ | ○ | ○ | ○ | ○ | ○ |
| Developing collaborative arrangements such as intermediate care (collaboration between the various healthcare providers through the establishment of intermediate-level care, within a regional network, through the joint development of an integrated care plan) | ○ | ○ | ○ | ○ | ○ | ○ | ○ | ○ | ○ | ○ |
| Developing a shared vision (agreements on a shared vision, what information other disciplines need, when referral to another discipline constitutes appropriate care, who holds which responsibility within the treatment trajectory) | ○ | ○ | ○ | ○ | ○ | ○ | ○ | ○ | ○ | ○ |
| Improving the application of guidelines (information, advice, treatment, and referral in line with the Stepped Care strategy as described in the guidelines) | ○ | ○ | ○ | ○ | ○ | ○ | ○ | ○ | ○ | ○ |
| Improving training (organising joint regional training sessions for healthcare providers) | ○ | ○ | ○ | ○ | ○ | ○ | ○ | ○ | ○ | ○ |

*[Space for comments]*

## What is needed? – Improving Communication

In the Round 1 survey you were also asked what is needed to improve collaboration. After analysis, the following categories and recommendations emerged. Please rate each recommendation with a score between 0 and 10.

**Improving communication...**

| **Recommendation** | **1** | **2** | **3** | **4** | **5** | **6** | **7** | **8** | **9** | **10** |
| --- | --- | --- | --- | --- | --- | --- | --- | --- | --- | --- |
| ...by sharing contact details of healthcare providers | ○ | ○ | ○ | ○ | ○ | ○ | ○ | ○ | ○ | ○ |
| ...by using Siilo | ○ | ○ | ○ | ○ | ○ | ○ | ○ | ○ | ○ | ○ |
| ...by using email | ○ | ○ | ○ | ○ | ○ | ○ | ○ | ○ | ○ | ○ |
| ...by using telephone | ○ | ○ | ○ | ○ | ○ | ○ | ○ | ○ | ○ | ○ |
| ...by using Zorgdomein | ○ | ○ | ○ | ○ | ○ | ○ | ○ | ○ | ○ | ○ |
| ...by utilising digital possibilities | ○ | ○ | ○ | ○ | ○ | ○ | ○ | ○ | ○ | ○ |
| ...by standardising information provision | ○ | ○ | ○ | ○ | ○ | ○ | ○ | ○ | ○ | ○ |
| ...by developing shared patient leaflet materials | ○ | ○ | ○ | ○ | ○ | ○ | ○ | ○ | ○ | ○ |

*[Space for comments]*

## What is needed? – Developing Collaborative Arrangements

**Developing collaborative arrangements...**

| **Recommendation** | **1** | **2** | **3** | **4** | **5** | **6** | **7** | **8** | **9** | **10** |
| --- | --- | --- | --- | --- | --- | --- | --- | --- | --- | --- |
| ...through joint clinics (GP – orthopaedic surgeon) | ○ | ○ | ○ | ○ | ○ | ○ | ○ | ○ | ○ | ○ |
| ...through joint clinics (GP – physiotherapist) | ○ | ○ | ○ | ○ | ○ | ○ | ○ | ○ | ○ | ○ |
| ...through joint clinics (physiotherapist – orthopaedic surgeon) | ○ | ○ | ○ | ○ | ○ | ○ | ○ | ○ | ○ | ○ |
| ...by collaborating within a regional osteoarthritis network | ○ | ○ | ○ | ○ | ○ | ○ | ○ | ○ | ○ | ○ |
| ...by organising joint meetings | ○ | ○ | ○ | ○ | ○ | ○ | ○ | ○ | ○ | ○ |
| ...by knowing what primary care services are available | ○ | ○ | ○ | ○ | ○ | ○ | ○ | ○ | ○ | ○ |
| ...by creating an intermediate care centre | ○ | ○ | ○ | ○ | ○ | ○ | ○ | ○ | ○ | ○ |

*[Space for comments]*

## What is needed? – Better Application of Guidelines

**Better application of guidelines...**

| **Recommendation** | **1** | **2** | **3** | **4** | **5** | **6** | **7** | **8** | **9** | **10** |
| --- | --- | --- | --- | --- | --- | --- | --- | --- | --- | --- |
| ...through clear inclusion and exclusion criteria for referral to secondary care | ○ | ○ | ○ | ○ | ○ | ○ | ○ | ○ | ○ | ○ |
| ...by physiotherapists | ○ | ○ | ○ | ○ | ○ | ○ | ○ | ○ | ○ | ○ |
| ...by reviewing the guidelines together (GPs, orthopaedic surgeons, and physiotherapists) | ○ | ○ | ○ | ○ | ○ | ○ | ○ | ○ | ○ | ○ |

*[Space for comments]*

## What is needed? – Increasing Knowledge of Treatment Options

**Increasing knowledge of healthcare providers about the treatment options of other disciplines...**

| **Recommendation** | **1** | **2** | **3** | **4** | **5** | **6** | **7** | **8** | **9** | **10** |
| --- | --- | --- | --- | --- | --- | --- | --- | --- | --- | --- |
| ...by knowing who does what | ○ | ○ | ○ | ○ | ○ | ○ | ○ | ○ | ○ | ○ |
| ...by knowing who has which expertise | ○ | ○ | ○ | ○ | ○ | ○ | ○ | ○ | ○ | ○ |
| ...by knowing which steps need to have been taken in secondary care before proceeding to surgery | ○ | ○ | ○ | ○ | ○ | ○ | ○ | ○ | ○ | ○ |
| ...by training GPs about the content of physiotherapy and (conservative) orthopaedic treatments | ○ | ○ | ○ | ○ | ○ | ○ | ○ | ○ | ○ | ○ |
| ...by organising joint regional meetings | ○ | ○ | ○ | ○ | ○ | ○ | ○ | ○ | ○ | ○ |

*[Space for comments]*

## What is needed? – Improving Lifestyle Advice

**Improving information and advice on lifestyle...**

| **Recommendation** | **1** | **2** | **3** | **4** | **5** | **6** | **7** | **8** | **9** | **10** |
| --- | --- | --- | --- | --- | --- | --- | --- | --- | --- | --- |
| ...by deploying lifestyle coaches with knowledge of osteoarthritis | ○ | ○ | ○ | ○ | ○ | ○ | ○ | ○ | ○ | ○ |
| ...by raising GPs' awareness of the role of lifestyle in osteoarthritis | ○ | ○ | ○ | ○ | ○ | ○ | ○ | ○ | ○ | ○ |
| ...by improved information from orthopaedic surgeons about the role of lifestyle in osteoarthritis | ○ | ○ | ○ | ○ | ○ | ○ | ○ | ○ | ○ | ○ |

*[Space for comments]*

## What is needed? – Financial Incentives for Collaboration

**Financially rewarding time spent on collaboration...**

| **Recommendation** | **1** | **2** | **3** | **4** | **5** | **6** | **7** | **8** | **9** | **10** |
| --- | --- | --- | --- | --- | --- | --- | --- | --- | --- | --- |
| ...through product-based financing for osteoarthritis care | ○ | ○ | ○ | ○ | ○ | ○ | ○ | ○ | ○ | ○ |
| ...by making consultation time billable | ○ | ○ | ○ | ○ | ○ | ○ | ○ | ○ | ○ | ○ |
| ...by making all forms of collaboration (meetings, joint clinics) billable | ○ | ○ | ○ | ○ | ○ | ○ | ○ | ○ | ○ | ○ |

*[Space for comments]*

## What is needed? – Developing a Shared Vision

**Developing a shared vision...**

| **Recommendation** | **1** | **2** | **3** | **4** | **5** | **6** | **7** | **8** | **9** | **10** |
| --- | --- | --- | --- | --- | --- | --- | --- | --- | --- | --- |
| ...by clarifying who holds which responsibility | ○ | ○ | ○ | ○ | ○ | ○ | ○ | ○ | ○ | ○ |
| ...through a more comprehensive referral/handover including treatment goals | ○ | ○ | ○ | ○ | ○ | ○ | ○ | ○ | ○ | ○ |
| ...by creating a shared care pathway | ○ | ○ | ○ | ○ | ○ | ○ | ○ | ○ | ○ | ○ |
| ...by jointly agreeing on care content and appropriate care | ○ | ○ | ○ | ○ | ○ | ○ | ○ | ○ | ○ | ○ |

*[Space for comments]*

## Clinical Vignettes – Round 2 Ratings

In the Round 1 survey you were asked to indicate what constitutes appropriate care for each vignette. Please rate each treatment option with a score between 1 and 10, where 10 is the most appropriate care and 1 is the least appropriate.

**Vignette 1 – Mr Jansen (GP Context)**

Mr Jansen (65 years old) reports that his walking distance is significantly limited by complaints resulting from his hip osteoarthritis. He is an avid walker, used to going on 30 km walks, but now struggles with 2 km. This has a major impact on his quality of life. He has no or almost no pain at rest, and his sleep is not disturbed. There are no comorbidities. He does regularly use pain relief and also uses an anti-inflammatory for walking. He asks his GP for a referral to an orthopaedic surgeon.

**What is appropriate care in this vignette?**

| **Recommendation** | **1** | **2** | **3** | **4** | **5** | **6** | **7** | **8** | **9** | **10** |
| --- | --- | --- | --- | --- | --- | --- | --- | --- | --- | --- |
| Refer to physiotherapist | ○ | ○ | ○ | ○ | ○ | ○ | ○ | ○ | ○ | ○ |
| Refer to orthopaedic surgeon | ○ | ○ | ○ | ○ | ○ | ○ | ○ | ○ | ○ | ○ |
| Prescribe adequate pain relief | ○ | ○ | ○ | ○ | ○ | ○ | ○ | ○ | ○ | ○ |
| Provide information and advice about osteoarthritis | ○ | ○ | ○ | ○ | ○ | ○ | ○ | ○ | ○ | ○ |
| Order imaging | ○ | ○ | ○ | ○ | ○ | ○ | ○ | ○ | ○ | ○ |
| Lifestyle advice / refer to dietitian or lifestyle coach | ○ | ○ | ○ | ○ | ○ | ○ | ○ | ○ | ○ | ○ |
| Request intra-articular injection | ○ | ○ | ○ | ○ | ○ | ○ | ○ | ○ | ○ | ○ |

*[Space for comments]*

**Vignette 2 – Mrs Pieterse (Physiotherapist Context)**

Mrs Pieterse (70 years old) has complaints in both knees, but very much wants to continue babysitting her grandchildren three days a week. This is now becoming more difficult; she can no longer lift the youngest onto the changing table and experiences increasing knee pain throughout a babysitting day. On babysitting days she takes pain relief preventively. She has consulted her physiotherapist, who establishes that her complaints may be consistent with knee osteoarthritis. Mrs Pieterse does not engage in sport, but cycles to her grandchildren and walks 1–2 times a day with her dog. BMI: 30.7.

**What is appropriate care in this vignette?**

| **Recommendation** | **1** | **2** | **3** | **4** | **5** | **6** | **7** | **8** | **9** | **10** |
| --- | --- | --- | --- | --- | --- | --- | --- | --- | --- | --- |
| Lifestyle advice / refer to dietitian or lifestyle coach | ○ | ○ | ○ | ○ | ○ | ○ | ○ | ○ | ○ | ○ |
| Refer to physiotherapy | ○ | ○ | ○ | ○ | ○ | ○ | ○ | ○ | ○ | ○ |
| Provide information and advice about osteoarthritis | ○ | ○ | ○ | ○ | ○ | ○ | ○ | ○ | ○ | ○ |
| Prescribe adequate pain relief | ○ | ○ | ○ | ○ | ○ | ○ | ○ | ○ | ○ | ○ |
| Refer to orthopaedic surgeon | ○ | ○ | ○ | ○ | ○ | ○ | ○ | ○ | ○ | ○ |
| Order imaging | ○ | ○ | ○ | ○ | ○ | ○ | ○ | ○ | ○ | ○ |
| Refer to GP | ○ | ○ | ○ | ○ | ○ | ○ | ○ | ○ | ○ | ○ |
| Refer to multidisciplinary programme | ○ | ○ | ○ | ○ | ○ | ○ | ○ | ○ | ○ | ○ |
| Refer to manual therapist | ○ | ○ | ○ | ○ | ○ | ○ | ○ | ○ | ○ | ○ |

*[Space for comments]*

**Vignette 3 – Mrs Van de Berk (Orthopaedic Surgeon Context)**

Mrs Van de Berk (64 years old) plays golf three times a week (18 holes) and babysits two days a week. She has suffered from lower back pain for several years. After various treatment trajectories with physiotherapists, she is referred to an orthopaedic surgeon by her GP. The surgeon confirms bilateral hip osteoarthritis with significant joint space narrowing, but almost no degenerative changes in the lumbar spine. She is not overweight and uses paracetamol only occasionally.

**What is appropriate care in this vignette?**

| **Recommendation** | **1** | **2** | **3** | **4** | **5** | **6** | **7** | **8** | **9** | **10** |
| --- | --- | --- | --- | --- | --- | --- | --- | --- | --- | --- |
| Refer to physiotherapy | ○ | ○ | ○ | ○ | ○ | ○ | ○ | ○ | ○ | ○ |
| Prescribe adequate pain relief | ○ | ○ | ○ | ○ | ○ | ○ | ○ | ○ | ○ | ○ |
| Provide information and advice about osteoarthritis | ○ | ○ | ○ | ○ | ○ | ○ | ○ | ○ | ○ | ○ |
| Intra-articular injection | ○ | ○ | ○ | ○ | ○ | ○ | ○ | ○ | ○ | ○ |
| Joint replacement surgery | ○ | ○ | ○ | ○ | ○ | ○ | ○ | ○ | ○ | ○ |
| Refer to GP | ○ | ○ | ○ | ○ | ○ | ○ | ○ | ○ | ○ | ○ |
| Refer to manual therapist | ○ | ○ | ○ | ○ | ○ | ○ | ○ | ○ | ○ | ○ |
| Order imaging | ○ | ○ | ○ | ○ | ○ | ○ | ○ | ○ | ○ | ○ |

*[Space for comments]*

Thank you for participating in Round 2 of this Delphi study. You will shortly receive a summary of the answers given to the questions and vignettes, and you will be invited to answer some new questions.

# Round 3 – Delphi Study on Collaboration in Hip and Knee Osteoarthritis Care

## Introduction

Dear colleague,

Thank you very much for your contributions to Rounds 1 and 2 of the Delphi study on recommendations to improve collaboration around the conservative care of hip and knee osteoarthritis. This survey is part of the 3rd and final round of the Delphi study.

In this survey you will read back the answers given by yourself and colleague GPs, orthopaedic surgeons, and physiotherapists who participated in Round 2 of this Delphi study. In this survey we ask you to place the 5 most important recommendations from Round 2 in the correct order. The recommendation you consider most important should be placed at position 1, through to position 5; the least important recommendations should be placed below.

In the interest of the study's progress, we would very much appreciate it if you could complete the survey within 2 weeks. Completing the survey takes approximately 10 minutes.

* 1. What is your email address?

*[open field]*

* 2. We wish to publish the results of this study. We would like to know whether you consent to having your name and affiliations mentioned in the acknowledgements of the article.

☐ Yes

☐ No

## Most Highly Rated Recommendations per Professional Group

In the Round 2 survey you were asked to rate recommendations to improve collaboration. After analysis of the responses, the recommendations with the highest ratings have been carried forward to Round 3. Below you will find these recommendations together with the average ratings per professional group. You will also find any comments. After reviewing this information, we ask you to prioritise the recommendations.

**Improving Communication**

| **Improving communication...** | **Average GPs** | **Average Orthopaedic Surgeons** | **Average Physiotherapists** |
| --- | --- | --- | --- |
| ...by utilising digital possibilities | 7.80 | 7.38 | 7.20 |
| ...by standardising information provision | 7.00 | 7.06 | 7.13 |

**Comments – Improving Communication**

- Use of peer-review consultations and patient consultations via Zorgdomein (GP).
- Patient leaflet material linked to a digital referral system or a link to thuisarts.nl in conjunction with existing guidelines — no new systems (GP).
- A system for sharing information that can be directly integrated into one's EPD (electronic patient record) system (orthopaedic surgeon).
- Fixed collaboration partners, knowing what each other says and does and can offer, and informing each other — ideally through channels linked to the patient record; in exceptional cases via Siilo/email/telephone depending on the type of consultation needed (GP).
- The last item is an important one, which is not yet being done in my view (GP).

**Developing Collaborative Arrangements**

| **Developing collaborative arrangements...** | **Average GPs** | **Average Orthopaedic Surgeons** | **Average Physiotherapists** |
| --- | --- | --- | --- |
| ...by collaborating within a regional osteoarthritis network | 6.40 | 7.00 | — |

**Comments – Developing Collaborative Arrangements**

- Let us please not create yet more care lines, care consultations, and collaborative arrangements. This type of care lends itself well, in my view, to good digital patient guidance and a very strong role for the physiotherapist (orthopaedic surgeon).
- More scope for e-consultations (GP).
- The efficiency of intermediate-level joint clinics is, in my view, low if everyone — especially primary care — adheres to their guidelines and best practices, and knows the added value (and limitations) of different options (GP).

**Better Application of Guidelines**

| **Better application of guidelines...** | **Average GPs** | **Average Orthopaedic Surgeons** | **Average Physiotherapists** |
| --- | --- | --- | --- |
| ...through clear inclusion and exclusion criteria for secondary care referral | 7.10 | 7.75 | 8.13 |
| ...by reviewing the guidelines together (GPs, orthopaedic surgeons, and physiotherapists) | 7.70 | 7.13 | 6.93 |

**Comments – Better Application of Guidelines**

- In general, GPs are well-informed about comorbidity (cardiac/pulmonary) and know the social map, meaning that considerations for treatment can well be evaluated there. It also prevents 'shopping' by familiarity with the complete dossier (which the physiotherapist does not have) (GP).
- Guidelines are clear but are not followed. Professional autonomy should be preserved — no strict exclusion criteria for secondary care referral. Sometimes the white coat is important for a patient; sometimes there is uncertainty, making referral entirely appropriate. The risk is also that many patients remain stuck in primary/community care (orthopaedic surgeon).
- Knowing that each other has expertise and works according to guidelines, and informing and finding each other when needed, seems more useful to me than in-/exclusion criteria; that plays into the hands of insurers and is certainly not in the interest of primary care. Knowing what community-level care has to offer is a useful addition, especially for patients with lower health literacy and fewer financial and social options (GP).
- Ideally one guideline would be developed for the condition rather than one per discipline (physiotherapist).

**Increasing Knowledge of Healthcare Providers about Treatment Options of Other Disciplines**

| **Increasing knowledge of healthcare providers about treatment options of other disciplines...** | **Average GPs** | **Average Orthopaedic Surgeons** | **Average Physiotherapists** |
| --- | --- | --- | --- |
| ...by knowing who has which expertise | 7.50 | 6.94 | 6.93 |
| ...by knowing which steps need to have been completed in secondary care before proceeding to surgery | 6.00 | 7.63 | 7.40 |
| ...by training GPs about the content of physiotherapy and (conservative) orthopaedic treatments | 6.70 | 7.56 | 7.00 |

**Comments – Knowledge of Treatment Options**

- Joint meetings can be useful, but... [comment truncated in source] (orthopaedic surgeon).

**Improving Lifestyle Information and Advice**

*Based on the responses, analysis, and low ratings, no recommendations from this category have been carried forward to the Round 3 survey.*

**Comments – Lifestyle Advice**

- Patient compliance is a limiting factor (for the portion of the target group where it would have the most impact) (GP).
- Not yet another provider! And there is very little evidence of long-term effects of GLI (Lifestyle Intervention) and lifestyle coaches (orthopaedic surgeon).
- I strongly support lifestyle advice, but do not believe there should be a role in this care for unregistered professions such as lifestyle coaches. Anyone with a STAP course can call themselves a lifestyle coach (orthopaedic surgeon).
- I assume orthopaedic surgeons are aware of the role of lifestyle, although not everyone takes the time to discuss it with the patient. I also don't have the impression that it is a lack of knowledge among myself or GP colleagues. It is more a matter of being able to deploy professionals (physiotherapists with interest and expertise in osteoarthritis and motivational interviewing techniques, and awareness of community-level options) and motivating the patient (GP).

**Financially Rewarding Time Spent on Collaboration**

| **Financially rewarding time spent on collaboration...** | **Average GPs** | **Average Orthopaedic Surgeons** | **Average Physiotherapists** |
| --- | --- | --- | --- |
| ...through product-based financing for osteoarthritis care | 6.30 | 8.00 | 8.20 |
| ...by making consultation time billable | 7.20 | 6.93 | 8.73 |
| ...by making all forms of collaboration (meetings, joint clinics) billable | 6.90 | 6.94 | 8.73 |

**Comments – Financial Incentives**

- Making consultation fees and collaboration billable will ensure this happens more often... which is precisely what we don't want (orthopaedic surgeon).
- Risk of uncontrolled growth of collaborative arrangements because it generates income, not because there is a measurable, proven improvement in outcomes (orthopaedic surgeon).
- We are healthcare providers; care should be reimbursed — not consultations and meetings (orthopaedic surgeon).
- With a maximum cap on consultation time (GP).

**Developing a Shared Vision**

| **Developing a shared vision...** | **Average GPs** | **Average Orthopaedic Surgeons** | **Average Physiotherapists** |
| --- | --- | --- | --- |
| ...by clarifying who holds which responsibility | 7.60 | 7.25 | 7.79 |
| ...by creating a shared care pathway | 7.10 | 7.81 | 7.40 |
| ...by jointly agreeing on care content and appropriate care | 7.60 | 7.75 | 7.67 |

**Comments – Shared Vision**

- Care pathways can never be uniformly designed; in my region I deal with some 6 larger treatment centres, each with their own structure and IT system (GP).
- Takes time — is there any? (GP).

## Question 3: Prioritising Recommendations

In the Round 2 survey you were asked to rate recommendations to improve collaboration. After analysis of the responses, the recommendations with the highest ratings have been carried forward to this survey. In this survey we ask you to place the 5 most important recommendations from Round 2 in the correct order. The most important recommendation should be placed at position 1, and the least important at positions 6 to 14. You can drag the recommendations to the correct position.

☰ ⬦ Improving communication by utilising digital possibilities

☰ ⬦ Improving communication by standardising information provision

☰ ⬦ Developing collaborative arrangements by collaborating within a regional osteoarthritis network

☰ ⬦ Better application of guidelines through clear inclusion and exclusion criteria for secondary care referral

☰ ⬦ Better application of guidelines by reviewing the guidelines together (GPs, orthopaedic surgeons, and physiotherapists)

☰ ⬦ Increasing knowledge of healthcare providers about treatment options of other disciplines by knowing who does what

☰ ⬦ Increasing knowledge of healthcare providers about treatment options of other disciplines by knowing who has which expertise

☰ ⬦ Increasing knowledge of healthcare providers about treatment options of other disciplines by knowing which steps need to have been completed in secondary care before proceeding to surgery

☰ ⬦ Increasing knowledge by training GPs about the content of physiotherapy and (conservative) orthopaedic treatments

☰ ⬦ Financially rewarding time spent on collaboration through product-based financing for osteoarthritis care

☰ ⬦ Financially rewarding time spent on collaboration by making consultation time billable

☰ ⬦ Financially rewarding time spent on collaboration by making all forms of collaboration (meetings, joint clinics) billable

☰ ⬦ Developing a shared vision by creating a shared care pathway

☰ ⬦ Developing a shared vision by jointly agreeing on care content and appropriate care

Positions:

1. ____________

2. ____________

3. ____________

4. (To complete your top 5)

5. (To complete your top 5)

**4. For each of your top 3 recommendations, name 1 concrete action.**

1. _______________________________________________

2. _______________________________________________

3. _______________________________________________

## Clinical Vignettes – Round 3 Ranking

Below you will find the three vignettes together with the different treatment options and the average scores from Round 2. Please indicate whether you agree with the ranking or whether you would adjust it.

**Vignette 1 – Mr Jansen (65 years old) – Average Scores from Round 2**

| **Treatment option** | **Average (Round 2)** |
| --- | --- |
| Provide information and advice about osteoarthritis | 7.87 |
| Refer to physiotherapist | 7.66 |
| Prescribe adequate pain relief | 6.82 |
| Lifestyle advice / refer to dietitian or lifestyle coach | 5.68 |
| Order imaging | 4.69 |
| Refer to orthopaedic surgeon | 4.47 |
| Refer to orthopaedic surgeon with intra-articular injection request | 3.97 |

**Comments – Vignette 1 (Round 2)**

- The decision not to refer for imaging depends for me on how his movement patterns are. How does someone function in a loaded situation and how is this passive? If someone shows a normal movement pattern, it could still be an indication for imaging (physiotherapist).
- Explanation and treatment via the standard. Given how much walking he previously did, physiotherapy would probably offer little added value? Weight loss has not been proven effective as such; lifestyle coaches have little evidence. X-ray not necessary according to NICE osteoarthritis criteria. A GP referring for imaging does not suddenly start performing surgery (orthopaedic surgeon).
- If you are certain it is osteoarthritis, an X-ray is not needed. At the time of considering surgical referral (TUV) an X-ray may be considered. A joint replacement for hip osteoarthritis does have a favourable prognosis in my experience. I understand that the patient has this question and prefers it over chronic pain medication. How to deal with that (GP).

**5. Do you agree with the ranking, or would you adjust it? Place your 3 most important treatment options at positions 1 to 3, and the least important at positions 4–7.**

☰ ⬦ Provide information and advice about osteoarthritis

☰ ⬦ Refer to physiotherapist

☰ ⬦ Prescribe adequate pain relief

☰ ⬦ Lifestyle advice / refer to dietitian or lifestyle coach

☰ ⬦ Order imaging

☰ ⬦ Refer to orthopaedic surgeon

☰ ⬦ Refer to orthopaedic surgeon with intra-articular injection request

**Vignette 2 – Mrs Pieterse (70 years old) – Average Scores from Round 2**

| **Treatment option** | **Average (Round 2)** |
| --- | --- |
| Provide information and advice about osteoarthritis | 8.74 |
| Lifestyle advice / refer to dietitian or lifestyle coach | 8.24 |
| Start physiotherapeutic treatment | 7.63 |
| Refer to GP | 5.86 |
| Refer to GP for adequate pain relief | 5.84 |
| Refer to GP for referral to multidisciplinary programme | 5.69 |
| Refer to GP for referral to orthopaedic surgeon | 3.53 |
| Refer to GP to request imaging | 3.36 |
| Refer to manual therapist | 2.84 |

**6. Do you agree with the ranking, or would you adjust it? Place your 3 most important treatment options at positions 1 to 3, and the least important at positions 4–9.**

☰ ⬦ Provide information and advice about osteoarthritis

☰ ⬦ Lifestyle advice / refer to dietitian or lifestyle coach

☰ ⬦ Start physiotherapeutic treatment

☰ ⬦ Refer to GP

☰ ⬦ Refer to GP for adequate pain relief

☰ ⬦ Refer to GP for referral to multidisciplinary programme

☰ ⬦ Refer to GP for referral to orthopaedic surgeon

☰ ⬦ Refer to GP to request imaging

☰ ⬦ Refer to manual therapist

**Vignette 3 – Mrs Van de Berk (64 years old) – Average Scores from Round 2**

| **Treatment option** | **Average (Round 2)** |
| --- | --- |
| Provide information and advice about osteoarthritis | 8.53 |
| Refer to physiotherapy | 7.65 |
| Prescribe adequate pain relief | 6.29 |
| Joint replacement surgery | 4.95 |
| Intra-articular injection | 4.86 |
| Order imaging | 3.65 |
| Refer to GP | 3.62 |
| Refer to manual therapist | 3.37 |

**Comments – Vignette 3 (Round 2)**

- Has not yet had active exercise therapy (orthopaedic surgeon).
- She has already been to the GP, has had physiotherapy, manual therapy, and X-ray (orthopaedic surgeon).
- There are multiple options: first maximise conservative treatment, possibly injection to confirm diagnosis, possibly joint replacement (orthopaedic surgeon).
- She already has physiotherapy; injections discouraged for hip osteoarthritis; already an active woman; in my view, maintenance medication via GP, OTC medication to try first — seems more appropriate in primary/community care (orthopaedic surgeon).

**7. Do you agree with the ranking, or would you adjust it? Place your 3 most important treatment options at positions 1 to 3, and the least important at positions 4–8.**

☰ ⬦ Provide information and advice about osteoarthritis

☰ ⬦ Refer to physiotherapy

☰ ⬦ Prescribe adequate pain relief

☰ ⬦ Joint replacement surgery

☰ ⬦ Intra-articular injection

☰ ⬦ Order imaging

☰ ⬦ Refer to GP

☰ ⬦ Refer to manual therapist

**Thank you for participating in Round 3 of this Delphi study. With all the responses collected, the researchers can now proceed with this study and the publication of the results. Thank you for your cooperation!**
