# Supplementary material
Source: Research Square preprint supplement (doi:10.21203/rs.3.rs-9481684/v1)
Supplement: Supplementary file 2 [file 4e5e20573e6fca7376aef5cd.docx]

**Supplementary file 2**

Table S1. Differences in rating among the three distinct disciplines

|  | GPs (n=10) | PTs (n=16) | OSs (n=15) | Total (N= 41) | |
| --- | --- | --- | --- | --- | --- |
|  | Mean (SD) | Mean (SD) | Mean (SD) | Mean (SD) | Median |
| Make time spent on communication among HCPs billable | 8.2 (1.1) | 8.6 (1.5) | 7.1 (2.6) | 8.0 (2.0) | 8 |
| Make all types of collaboration billable | 7.9 (1.0) | 8.6 (1.5) | 6.9 (2.3) | 7.8 (1.9) | 8 |
| Agree on referral criteria for hospital-based care | 7.1 (2.9) | 8.1 (1.3) | 7.7 (2.3) | 7.7 (2.1) | 8 |
| Interdisciplinary agreement on appropriate care | 7.6 (1.0) | 7.6 (1.6) | 7.7 (2.1) | 7.7 (1.7) | 8 |
| Make integral treatment of osteoarthritis billable | 6.3 (2.3) | 8.2 (1.5) | 8.0 (1.1) | 7.7 (1.7) | 8 |
| Raise awareness of criteria for joint replacement | 7.8 (0.9) | 7.4 (1.9) | 7.7 (2.3) | 7.6 (1.8) | 8 |
| Define responsibilities of HCPs | 7.4 (0.8) | 7.7 (1.8) | 7.3 (1.6) | 7.5 (1.5) | 7.5 |
| Define OA care pathway | 7.0 (1.6) | 7.4 (1.4) | 7.7 (2.2) | 7.4 (1.8) | 8 |
| Improve communication among HCPs through the use of digital tools | 7.8 (0.9) | 7.2 (1.9) | 7.4 (2.2) | 7.4 (1.8) | 8 |
| Educate GPs and OSs about treatment options of PTs | 7.5 (1.4) | 7.1 (1.9) | 7.4 (2.4) | 7.3 (2.0) | 8 |
| Multidisciplinary discussion of guidelines | 7.7 (1.2) | 7.0 (1.9) | 6.9 (2.3) | 7.1 (1.9) | 8 |
| Standardise patient information | 6.9 (1.6) | 7.3 (1.4) | 7.1 (2.7) | 7.1 (2.0) | 8 |
| Educate HCPs about expertise of other disciplines | 7.5 (0.7) | 7.0 (2.2) | 6.9 (2.8) | 7.1 (2.1) | 8 |
| Cooperation within regional network of HCPs | 6.4 (1.4) | 7.4 (2.0) | 7.0 (2.2) | 7.0 (2.0) | 8 |
| Raise awareness of GPs of the importance of lifestyle change | 5.4 (2.2) | 7.4 (1.5) | 7.6 (2.2) | 7.0 (2.1) | 7 |
| Educate HCPs about treatment options offered by other disciplines | 7.3 (0.8) | 7.1 (2.0) | 6.6 (2.9) | 7.0 (2.2) | 8 |
| Better patient education | 6.1 (1.8) | 7.6 (1.6) | 6.9 (2.0) | 7.0 (1.8) | 7 |
| Joint development of leaflets for patients | 7.1 (2.1) | 6.6 (1.8) | 7.1 (2.3) | 6.9 (2.0) | 7 |
| Organise regional meetings for HCPs | 6.9 (1.3) | 6.5 (2.3) | 7.1 (2.1) | 6.8 (2.0) | 7 |
| Improve communication through Siilo, an app for HCPs | 5.6 (2.8) | 8.5 (1.2) | 5.8 (3.0) | 6.8 (2.7) | 7 |
| Organise interdisciplinary meetings for HCPs | 5.8 (1.9) | 7.1 (2.0) | 7.1 (1.2) | 6.8 (1.8) | 7 |
| Improve communication among HCPs through digital referral sys | 7.8 (1.0) | 6.5 (2.1) | 6.3 (1.7) | 6.7 (1.8) | 7 |
| Organise joint consultation GP-PT | 5.7 (2.3) | 7.9 (1.8) | 6.2 (2.0) | 6.7 (2.2) | 7 |
| Improve documentation of reasons for referral | 6.7 (1.7) | 6.5 (2.3) | 7.0 (2.2) | 6.7 (2.1) | 7 |
| Better adherence to guidelines by PTs | 6.8 (2.0) | 6.9 (1.9) | 6.4 (2.7) | 6.7 (2.2) | 7 |
| Exchange of contact details HCPs | 6.5 (1.9) | 6.5 (1.5) | 6.4 (2.2) | 6.5 (1.8) | 6 |
| Educate HCPS about preventive measures in the community | 6.9 (1.3) | 6.3 (2.0) | 6.2 (2.4) | 6.4 (2.0) | 6 |
| Better utilization of lifestyle coaches | 6.2 (2.1) | 6.4 (1.7) | 6.2 (3.2) | 6.3 (2.4) | 6 |
| Organise joint consultation PT-OS | 5.3 (1.9) | 7.3 (1.7) | 5.5 (2.7) | 6.1 (2.3) | 7 |
| Better communication among HCPs through e-mail | 6.5 (2.0) | 5.8 (2.7) | 5.3 (2.9) | 5.8 (2.6) | 7 |
| Organise joint consultation GP-OS | 5.7 (1.9) | 6.1 (1.8) | 5.3 (2.8) | 5.7 (2.2) | 6 |
| Relocate care | 5.6 (2.1) | 5.7 (2.5) | 5.3 (2.8) | 5.5 (2.5) | 6 |
| Better communication among HCPs by phone | 6.1 (1.7) | 4.9 (2.5) | 5.1 (2.9) | 5.3 (2.5) | 6 |
