# Supplementary material
Source: Research Square preprint supplement (doi:10.21203/rs.3.rs-9481684/v1)
Supplement: Supplementary file 3 [file 50977a8bbb17e3434644f7ec.docx]

**Supplementary file 3**

Table S2: Treatment options ranked by their mean total score

| Case 1. A male patient who previously enjoyed 30 km walks now has a significantly reduced walking capacity, limited to just 2 km. This limitation has greatly impacted his quality of life. He relies on pain medication to manage discomfort while walking and is seeking a referral to an OS from his GP. | | | |
| --- | --- | --- | --- |
|  | GPs (n=10) | PTs (n=16) | OSs (n=15) |
| Education on osteoarthritis and treatment options | 8.0 (0.0) | 7.9 (1.2) | 8.3 (1.3) |
| Treatment by physiotherapist | 8.4 (0.5) | 8.5 (1.8) | 6.9 (2.7) |
| Take care of adequate pain medication | 6.9 (1.8) | 6.4 (2.2) | 7.7 (1.9) |
| Support by lifestyle coach/dietician | **7.7 (0.5)** | **5.1 (2.6)** | **5.7 (2.9)** |
| Indication for imaging | **4.7 (2.6)** | **3.8 (3.0)** | **5.9 (2.8)** |
| Assessment by OS | 5.3 (1.6) | 4.2 (3.1) | 4.9 (2.9) |
| Indication for intra-articular injection | **6.6 (1.0)** | **4.8 (2.7)** | **2.2 (1.8)** |
|  |  |  |  |
| Case 2: Overweight, female patient with complaints in both knees who increasingly experiences limitations in her activities consults her physiotherapist. | | | |
| Education on osteoarthritis and treatment options | 8.1 (0.6) | 8.9 (1.0) | 8.9 (1.2) |
| Support by lifestyle coach/dietician | 8.1 (1.1) | 8.7 (1.2) | 7.8 (2.6) |
| Treatment by physiotherapist | **7.1 (2.6)** | **9.1 (1.2)** | **6.5 (3.4)** |
| (Re)assessment by GP | **4.9 (2.4)** | **5.2 (2.5)** | **7.1 (2.1)** |
| Take care of adequate pain medication | 5.9 (2.9) | 6.5 (2.7) | 5.2 (3.1) |
| Team care | 5.5 (2.8) | 5.7 (2.7) | 5.8 (2.8) |
| Assessment by OS | 3.5 (2.4) | 2.9 (2.0) | 4.1 (3.0) |
| Indication for imaging | 2.9 (2.2) | 3.6 (2.2) | 3.4 (3.0) |
| Treatment by manual therapist | **4.3 (2.5)** | **3.0 (1.9)** | **1.9 (1.7)** |
|  |  |  |  |
| Case 3: A female patient with back problems but an active lifestyle is referred by her GP to the OS. The OS diagnoses her with radiographic OA in both hips, but not in the lower back. | | | |
| Adequate pain medication | 6.8 (2.3) | 6.0 (2.8) | 6.4 (3.1) |
| Education on osteoarthritis and treatment options | 8.1 (1.1) | 8.5 (1.4) | 8.7 (1.1) |
| Treatment by physiotherapist | **8.1 (1.0)** | **8.5 (1.9)** | **6.5 (3.3)** |
| Joint replacement | 4.6 (2.6) | 4.7 (2.9) | 5.4 (3.2) |
| Indication for intra-articular injection | 5.5 (2.6) | 5.5 (2.6) | 3.8 (2.8) |
| Indication for imaging | 4.0 (2.8) | 3.4 (2.6) | 3.7 (3.6) |
| (Re)assessment by GP | 4.8 (2.4) | 3.5 (2.4) | 3.1 (2.5) |
| Treatment by manual therapist | **4.9 (2.7)** | **3.7 (2.7)** | **2.3 (1.9)** |
